# Supplementary material
Source: Springer Nature journal article supplement (https://www.springermedizin.de/resource/supplementary/12885_2009_1803_MOESM3_ESM.pdf/9460742)

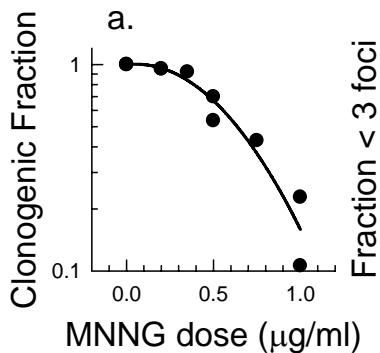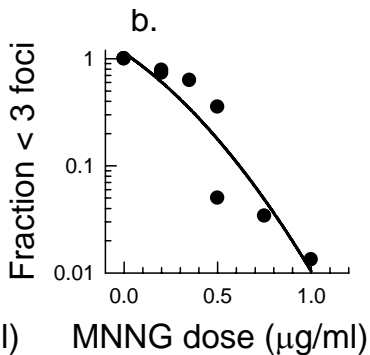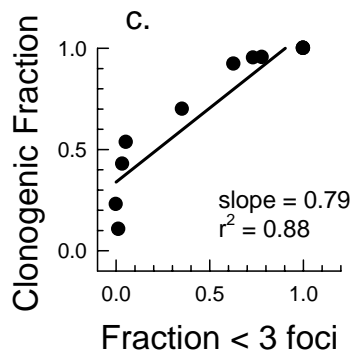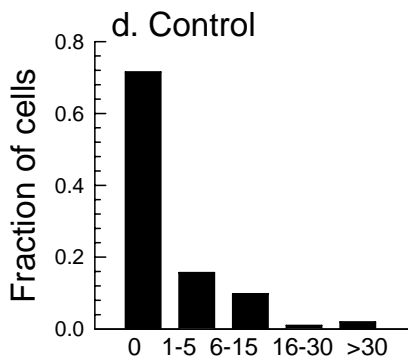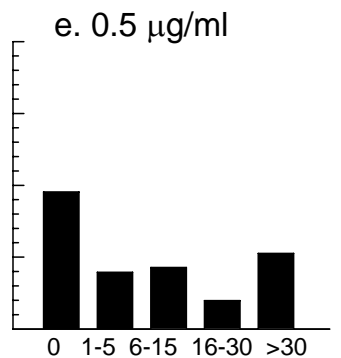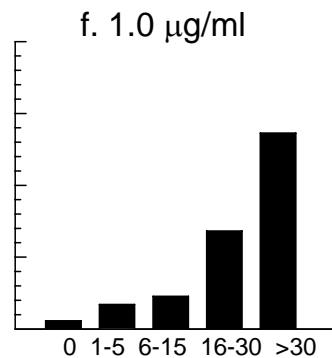

Number of foci per cell

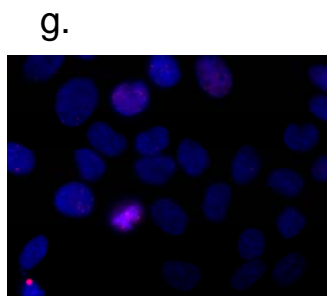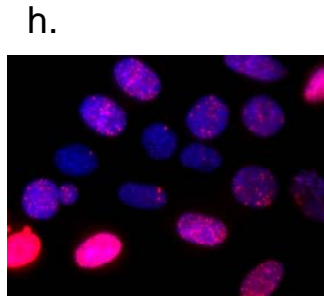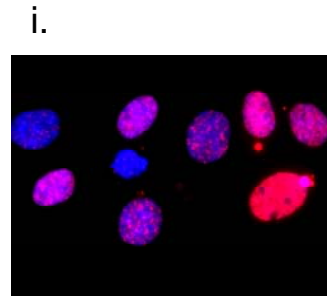

Supplement: MOESM3 [file 9460742]
